# Supplementary material for: One-pot sustainable synthesis of magnetic MIL-100(Fe) with novel Fe3O4 morphology and its application in heterogeneous degradation
Source: Royal Society of Chemistry journal article supplement (doi:10.1039/c7dt04819j), 2018-01-01
Supplement: c7dt04819j1.pdf [file c7dt04819j1.pdf]

## One-pot and sustainable synthesis of magnetic MIL-100(Fe) with novel Fe<sub>3</sub>O<sub>4</sub> morphology and its application in heterogeneous degradation

Huairu Tian,<sup>a</sup> Jun Peng,<sup>a</sup> Qiuzheng Du,<sup>a</sup> Xuanhong Hui<sup>a</sup> and Hua He<sup>\*a b c</sup>

### Preparation of materials

All chemicals were purchased from commercial sources and used without further treatments.

#### 1. Preparation of conventional MIL-100(Fe)

MIL-100(Fe) was prepared according to the previous reported<sup>1</sup>. Typically, a mixture of FeCl<sub>2</sub>·4H<sub>2</sub>O, H<sub>3</sub>BTC, HF, HNO<sub>3</sub> and H<sub>2</sub>O with a molar ratio of 1:0.67:2:0.6:277 was transferred into a Teflon liner. After stirred at 500 rpm for 30 min, the Teflon liner was sealed in a stainless-steel bomb and heated at 150 °C for 24 h. After Saffron yellow MIL-100(Fe) powder was collected, treatment in hot water (60 °C) for 3 h to remove the residual H<sub>3</sub>BTC. Then, the obtained saffron yellow powder was centrifuged at 8000 rpm for 10 min and dried under vacuum at 100 °C for 12 h.

#### 2. Preparation of Fe<sub>3</sub>O<sub>4</sub>

Fe<sub>3</sub>O<sub>4</sub> was prepared for comparison purposes. Synthesis procedure was the same with MIL-100(Fe)-M (H<sub>3</sub>BTC/4 NaOH) in this study, with one difference: without the H<sub>3</sub>BTC. Two different aqueous solutions were prepared firstly. Solution 1 contained 10.0 mmol NaOH. Solution 2 was prepared by dissolving 3.75 mmol of FeCl<sub>2</sub>·4H<sub>2</sub>O in deionized water. After becoming completely clear solutions in both cases, Solution 1 was added dropwise over Solution 2 under stirring. The stirring continued at room temperature for a certain time. The solid was recovered by an external magnet, and then three times with water and one more time with ethanol. The sample was dried at room temperature.

### Catalysis mechanism in SPEF oxidation process

With the proceeding of heterogeneous solar photo-electro-Fenton (SPEF) reaction, most of sodium sulfadiazine (SD) pollutant was removed and/or decomposed into intermediates, reducing the conversion rate of H<sub>2</sub>O<sub>2</sub> to •OH through Fenton oxidation reaction. The amount of •OH, formed by the catalytic decomposition of H<sub>2</sub>O<sub>2</sub> with active sites on cathode, is strongly depending on the nature of Fenton catalysts, to some extent, can reflect the Fenton catalytic activity.<sup>2</sup>

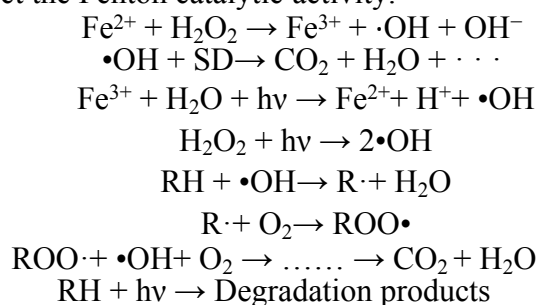

## Figure

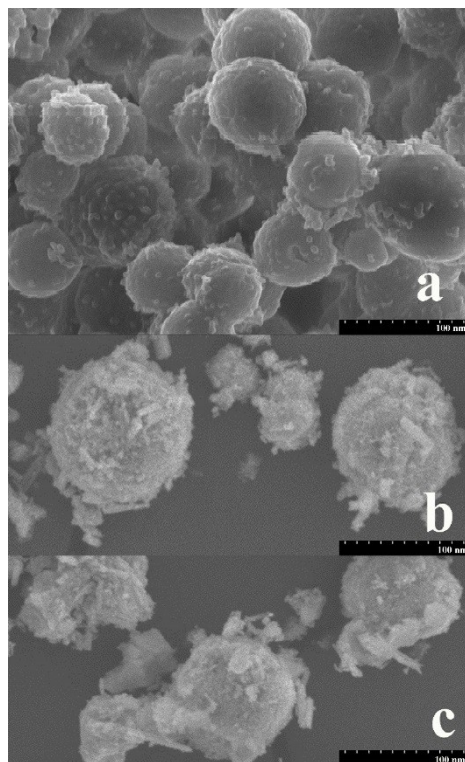

**Fig. S1** SEM of the MIL-100(Fe)-M (H<sub>3</sub>BTC/3.5 NaOH) (a) MIL-100(Fe)-M (H<sub>3</sub>BTC/4.5 NaOH) (b), MIL-100(Fe)-M (H<sub>3</sub>BTC/5.0 NaOH) (c)

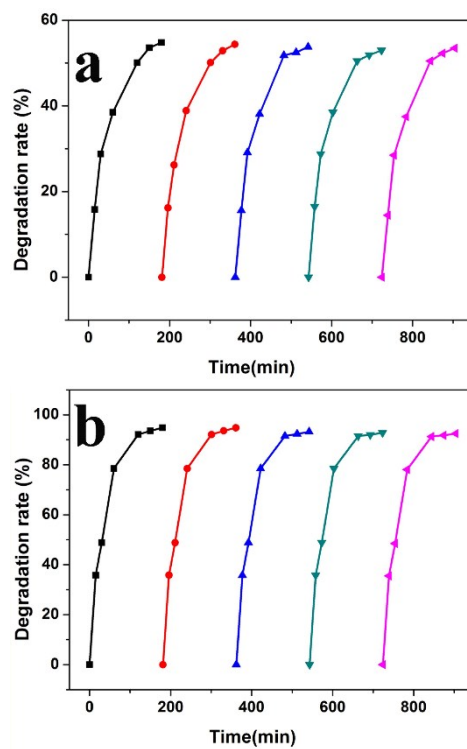

**Fig. S2** Catalytic activity of reused MIL-100(Fe)-RT(a) and MIL-100(Fe)-M (H<sub>3</sub>BTC/4 NaOH) (b)

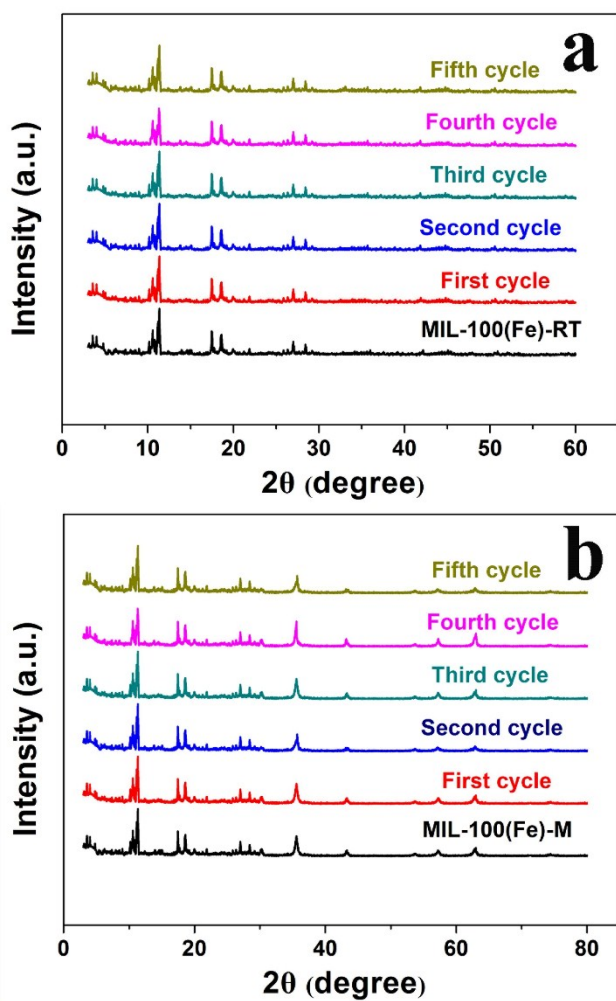

**Fig. S3** XRD spectrum of MIL-100(Fe)-RT(a) and MIL-100(Fe)-M (H<sub>3</sub>BTC/4 NaOH) (b) after five cycles for photodegradation of SD

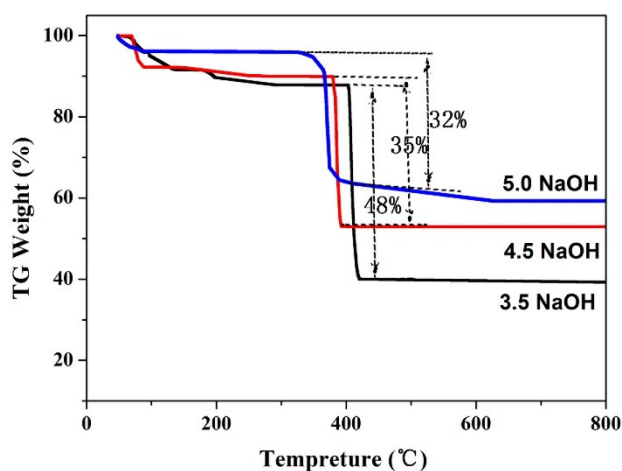

**Fig. S4** TGA plots of MIL-100(Fe)-M (H<sub>3</sub>BTC/3.5 NaOH), MIL-100(Fe)-M (H<sub>3</sub>BTC/4.5 NaOH), and MIL-100(Fe)-M (H<sub>3</sub>BTC/5.0 NaOH)

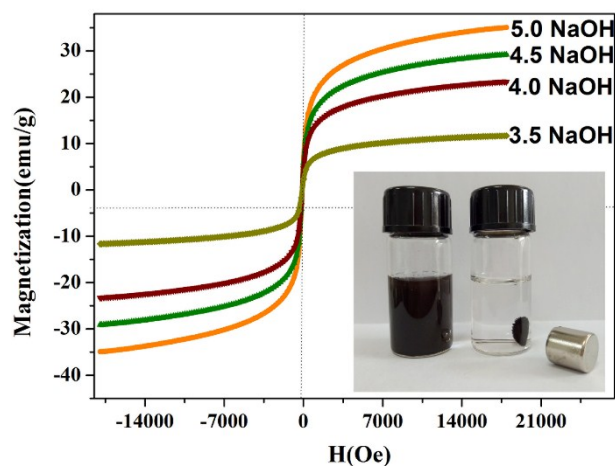

**Fig. S5** Magnetization curve of MIL-100(Fe)-M ( $H_3BTC/3.5-5.0$  NaOH) and inset showed the photographs before and after magnetic separation.

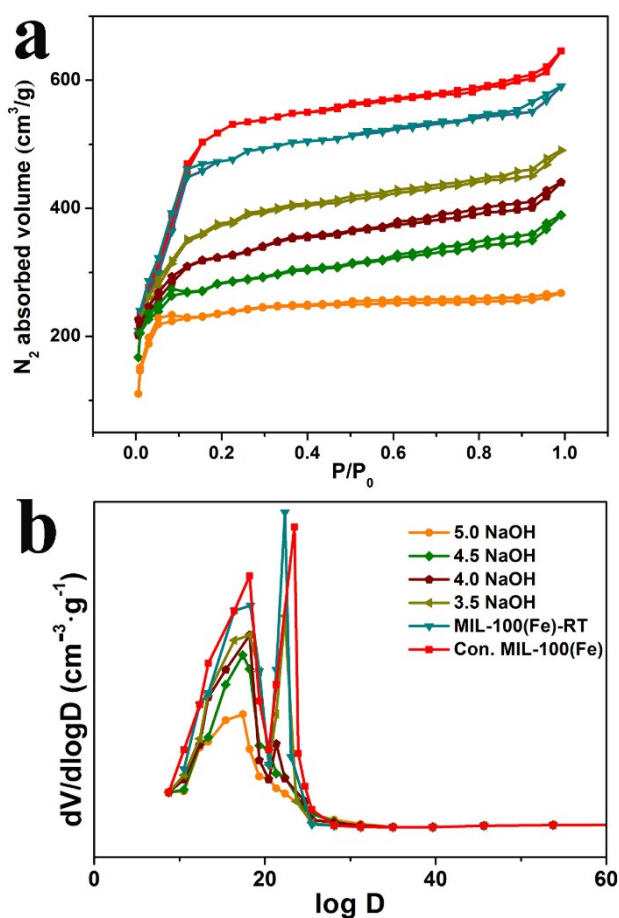

**Fig. S6**  $N_2$  adsorption/desorption isotherms (a) and pore size distribution curves (b) of samples: conventional MIL-100(Fe), MIL-100(Fe)-RT (black) and MIL-100(Fe)-M ( $H_3BTC/3.5-5.0$  NaOH), Full and empty symbols represent adsorption and desorption experimental points, respectively.

**Tab. S1** Textural properties of the samples

| Sample                                        | S <sub>BET</sub><br>(m <sup>2</sup> ·g <sup>-1</sup> ) | ext. S <sub>BET</sub><br>(m <sup>2</sup> ·g <sup>-1</sup> ) <sup>a</sup> | V <sub>p</sub><br>(cm <sup>3</sup> ·g <sup>-1</sup> ) <sup>b</sup> | PSD peaks<br>(nm) <sup>c</sup> |
|-----------------------------------------------|--------------------------------------------------------|--------------------------------------------------------------------------|--------------------------------------------------------------------|--------------------------------|
| MIL-100(Fe)                                   | 2214                                                   | 216                                                                      | 0.86                                                               | 1.82, 2.34                     |
| MIL-100(Fe)-RT                                | 2097                                                   | 187                                                                      | 0.81                                                               | 1.83, 2.23                     |
| MIL-100(Fe)-M<br>(H <sub>3</sub> BTC/3.5NaOH) | 1676                                                   | 134                                                                      | 0.72                                                               | 1.82, 2.23                     |
| MIL-100(Fe)-M<br>(H <sub>3</sub> BTC/4NaOH)   | 1433                                                   | 112                                                                      | 0.68                                                               | 1.81                           |
| MIL-100(Fe)-M<br>(H <sub>3</sub> BTC/4.5NaOH) | 1121                                                   | 86                                                                       | 0.55                                                               | 1.74                           |
| MIL-100(Fe)-M<br>(H <sub>3</sub> BTC/5NaOH)   | 663                                                    | 73                                                                       | 0.34                                                               | 1.76                           |

**a** Data from t-plot. External S<sub>BET</sub> is the difference between the total S<sub>BET</sub> and the microporous S<sub>BET</sub>. **b** Pore volume measured at p/p<sub>0</sub> = 0.98. **c** Maxima of the peaks found in pore size distribution by the applying BJH method to the adsorption branches

## Reference

1. R. Liang, S. Luo, F. Jing, L. Shen, N. Qin and L. Wu, *Applied Catalysis B: Environmental*, 2015, **176–177**, 240-248.
2. M. Li, Z. Qiang, C. Pulgarin and J. Kiwi, *Applied Catalysis B: Environmental*, 2016, **187**, 83-89.
